# Supplementary material for: Loss of Nucleobindin-2 Causes Insulin Resistance in Obesity without Impacting Satiety or Adiposity
Source: PubMed Central journal article supplement — Cell Rep. Author manuscript; Available in PMC 2018 Nov 8. (PMC6223120; doi:10.1016/j.celrep.2018.06.112), 2018-07-31
Supplement: NIHMS1503490-supplement-1.pdf [file NIHMS1503490-supplement-1.pdf]

**Cell Reports, Volume 24**

**Supplemental Information**

**Loss of Nucleobindin-2 Causes Insulin Resistance  
in Obesity without Impacting Satiety or Adiposity**

**Anthony Ravussin, Yun-Hee Youm, Jil Sander, Seungjin Ryu, Kim Nguyen, Luis Varela, Gerald I. Shulman, Sviatoslav Sidorov, Tamas L. Horvath, Joachim L. Schultze, and Vishwa Deep Dixit**

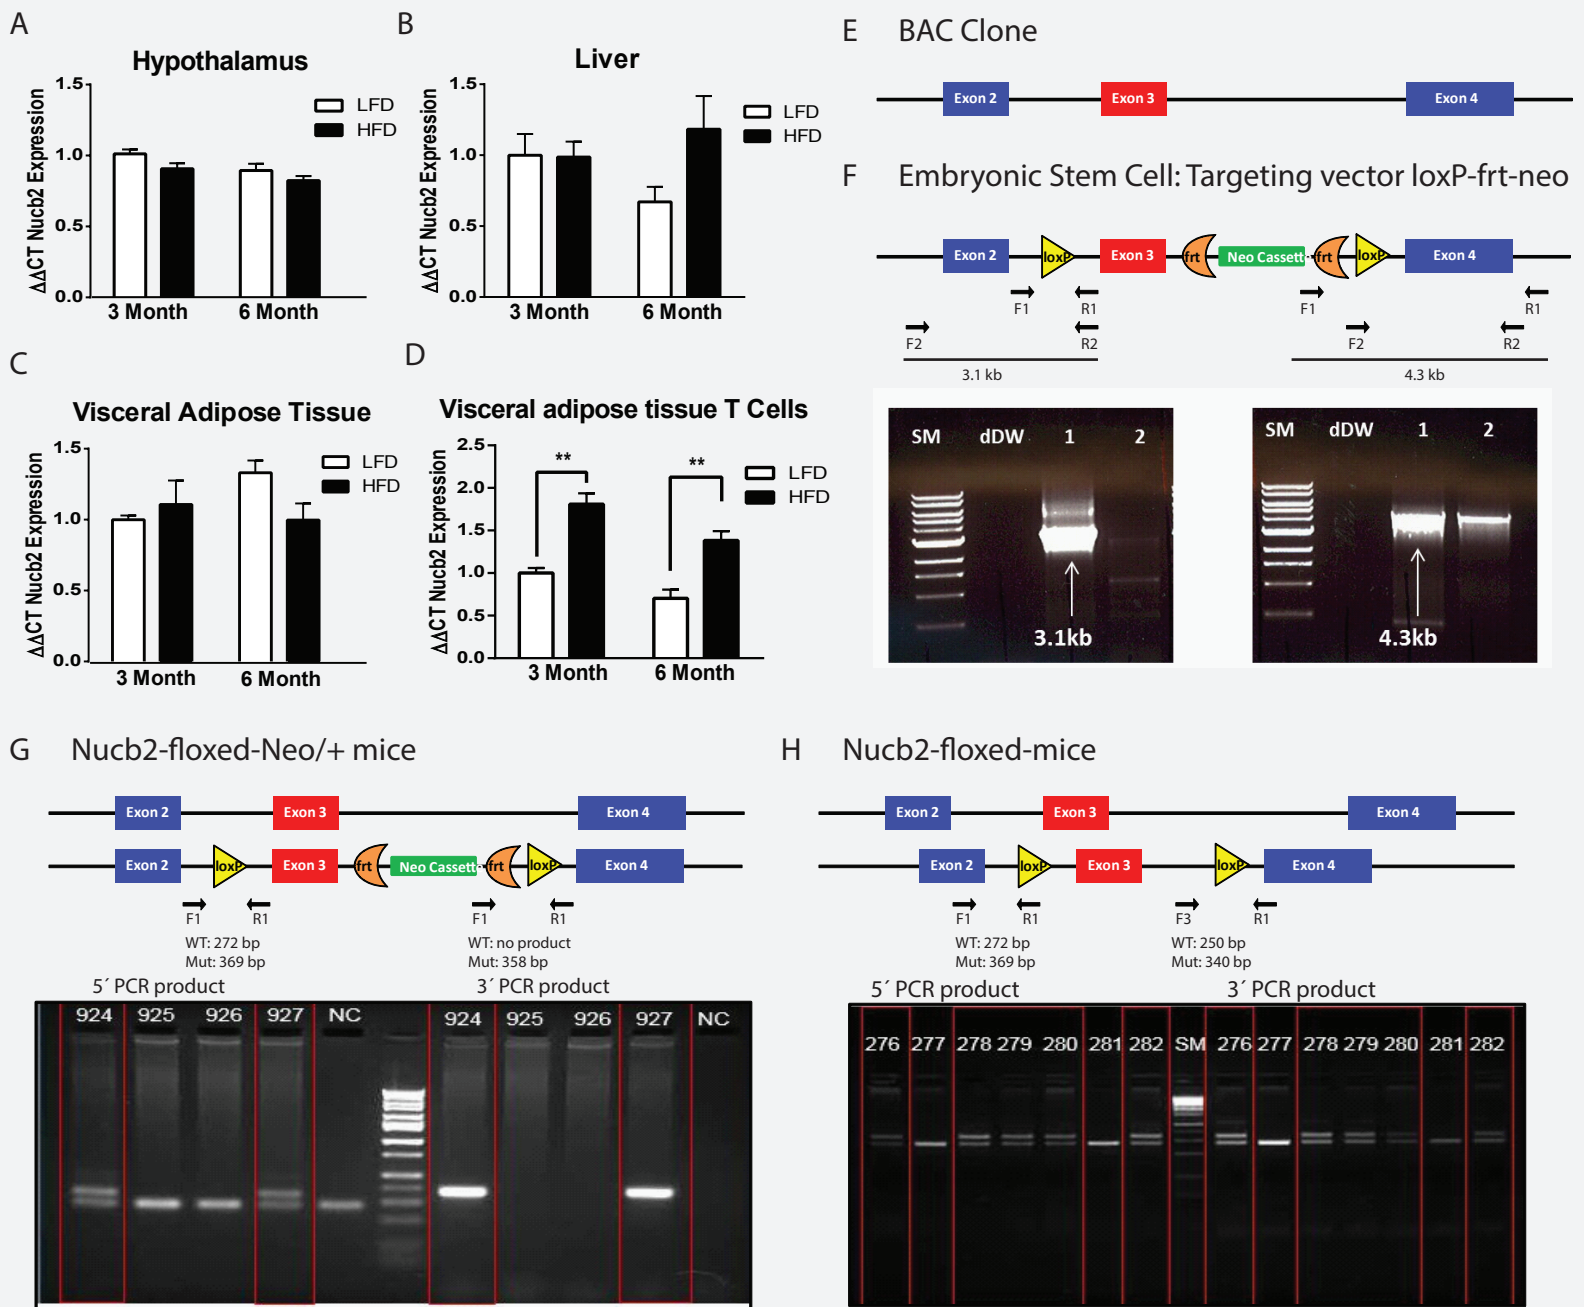

**Supplemental Figure 1. Nucb2 expression in response to high-fat diet and method of generation, characterization of Nucb2 floxed mice (Related to Figure 1A).**

Realtime PCR analysis of *Nucb2* mRNA in (A) Hypothalamus, (B) Liver (C) Visceral Adipose Tissue and (D) CD3<sup>+</sup> adipose tissue T cells in mice fed normal chow or a 60% HFD (n=6/group). (E) *Nucb2* KO construct design (F) Embryonic Stem Cell Targeting Vector and PCR validation. (G) PCR validation of floxed-Neo/+ mice. (H) PCR validation of floxed heterozygous mice.

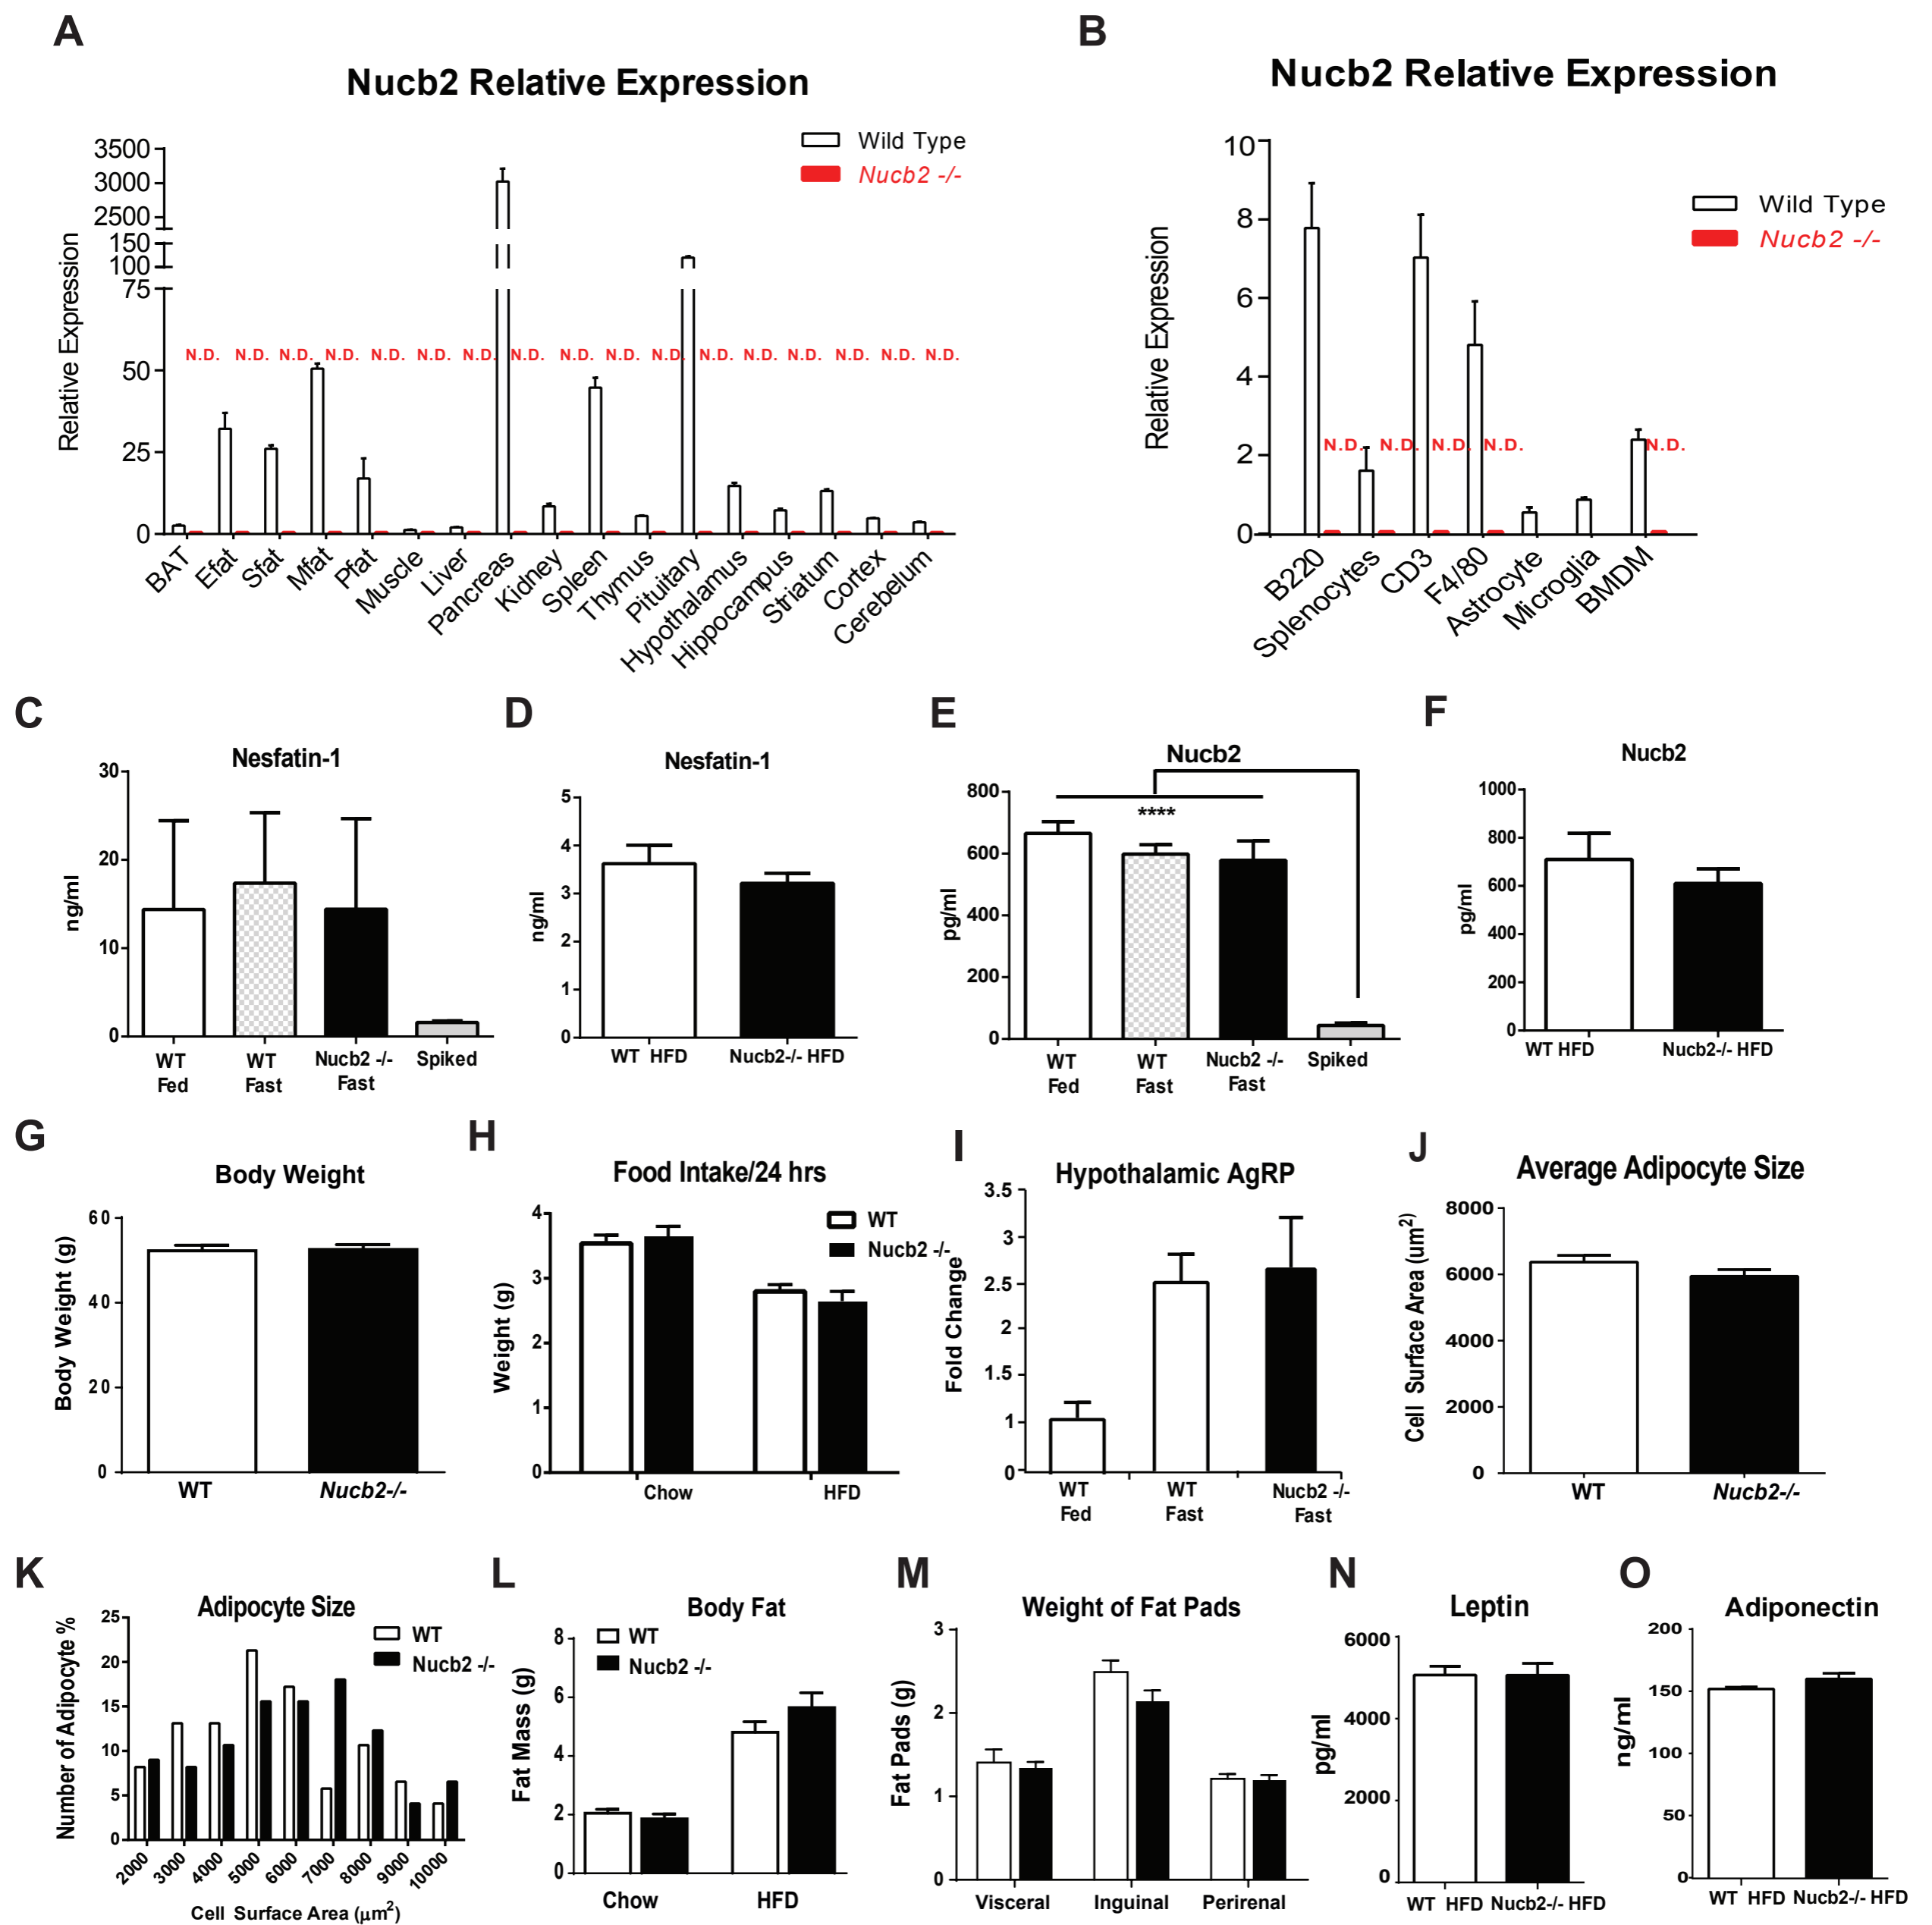

**Supplemental Figure 2. Characterization of *Nucb2* and Nesfatin-1 expression in tissues and sera and metabolic parameters in *Nucb2* deficient mice (Related to Figure 1B).**

Realtime PCR analysis of *Nucb2* mRNA in (A) Tissular and (B) cellular expression of *Nucb2* mRNA in WT and *Nucb2*<sup>-/-</sup> mice (n=4/group). Plasma nesfatin-1 and *Nucb2* (CUSA Bio) post-translational peptide ELISAs non-specifically detects the peptide in chow fed, 12 week old mice lacking *Nucb2* in fed or fasted state (C and E) (n=6/group). Spiked samples are the assay diluent (with no biological sample) spiked with (100nM) of recombinant nesfatin-1, nesfatin-2 and nesfatin-3. WT and *Nucb2*<sup>-/-</sup> 10 month old, male mice on a high fat diet (D and F) (n=5/group). (G) Body weight from 10 month old HFD mice (WT n=8, KO n=5) (H) Elimination of *Nucb2* does not regulate food intake in mice fed chow or 60% HFD. Food intake was measured by mass over 72 hours every 12 hours and represented over a 24 hour average (chow, n=8/group HFD, n=5-8/group). (I) Lack of *Nucb2* does not regulate AgRP mRNA expression in hypothalamus of fed and fasted mice. (J, K) Adipocyte size distribution histogram. The average size of adipocyte was measured by using Image J and averaging over 180 different cells from 4 different mice/strain. (L) Body fat. (M) Weight of fat pads. Plasma levels of (N) Leptin and (O) Adiponectin in WT and KO mice.

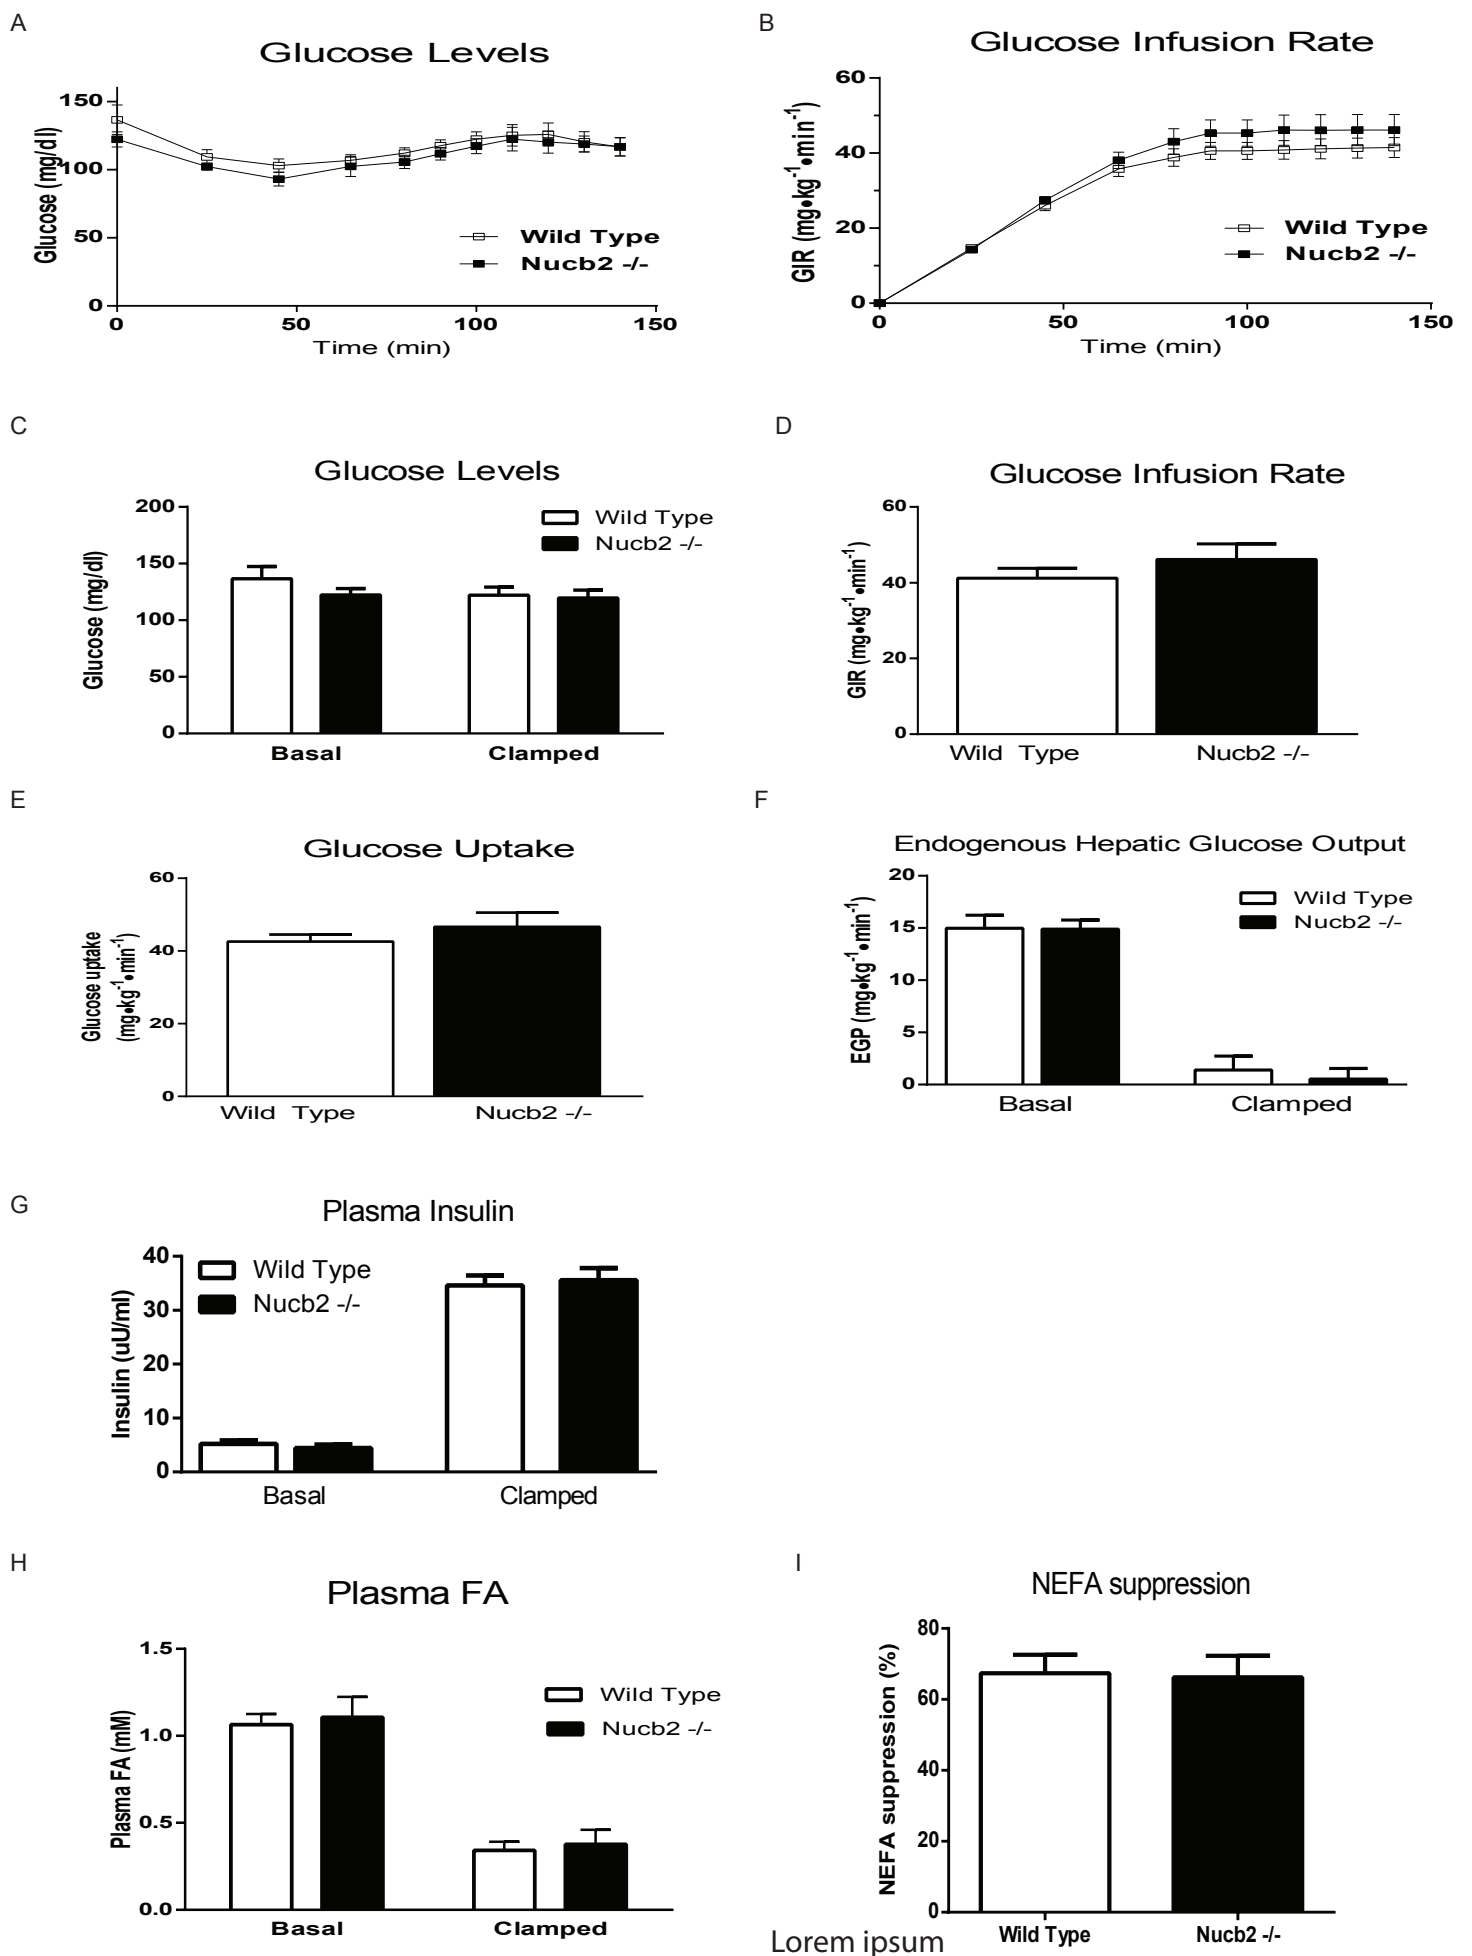

**Supplemental Figure 3. Effect of Nucb2 deletion on insulin-sensitivity in mice fed normal chow diet (Related to Figure 2A-F).**

(A) Time-course of plasma glucose levels (B) Glucose Infusion Rate (C) Basal and Clamped plasma glucose levels (D) End-point glucose infusion rate (E) Systemic glucose uptake during the steady-state period (final 40 min) of the clamp (F) and Basal and insulin-stimulated clamped hepatic endogenous glucose production. Male 14 week old chow fed mice and data are represented as mean  $\pm$  SEM (wild type, n=8 and *Nucb2*<sup>-/-</sup>, n=7) (G) Basal and clamped plasma insulin levels (H) Basal and insulin-stimulated clamped plasma free fatty acid levels (I) NEFA (Non-esterified Fatty Acids) Plasma fatty acid suppression. Data are represented as mean  $\pm$  SEM (wild type, n=8 and *Nucb2*<sup>-/-</sup>, n=7).

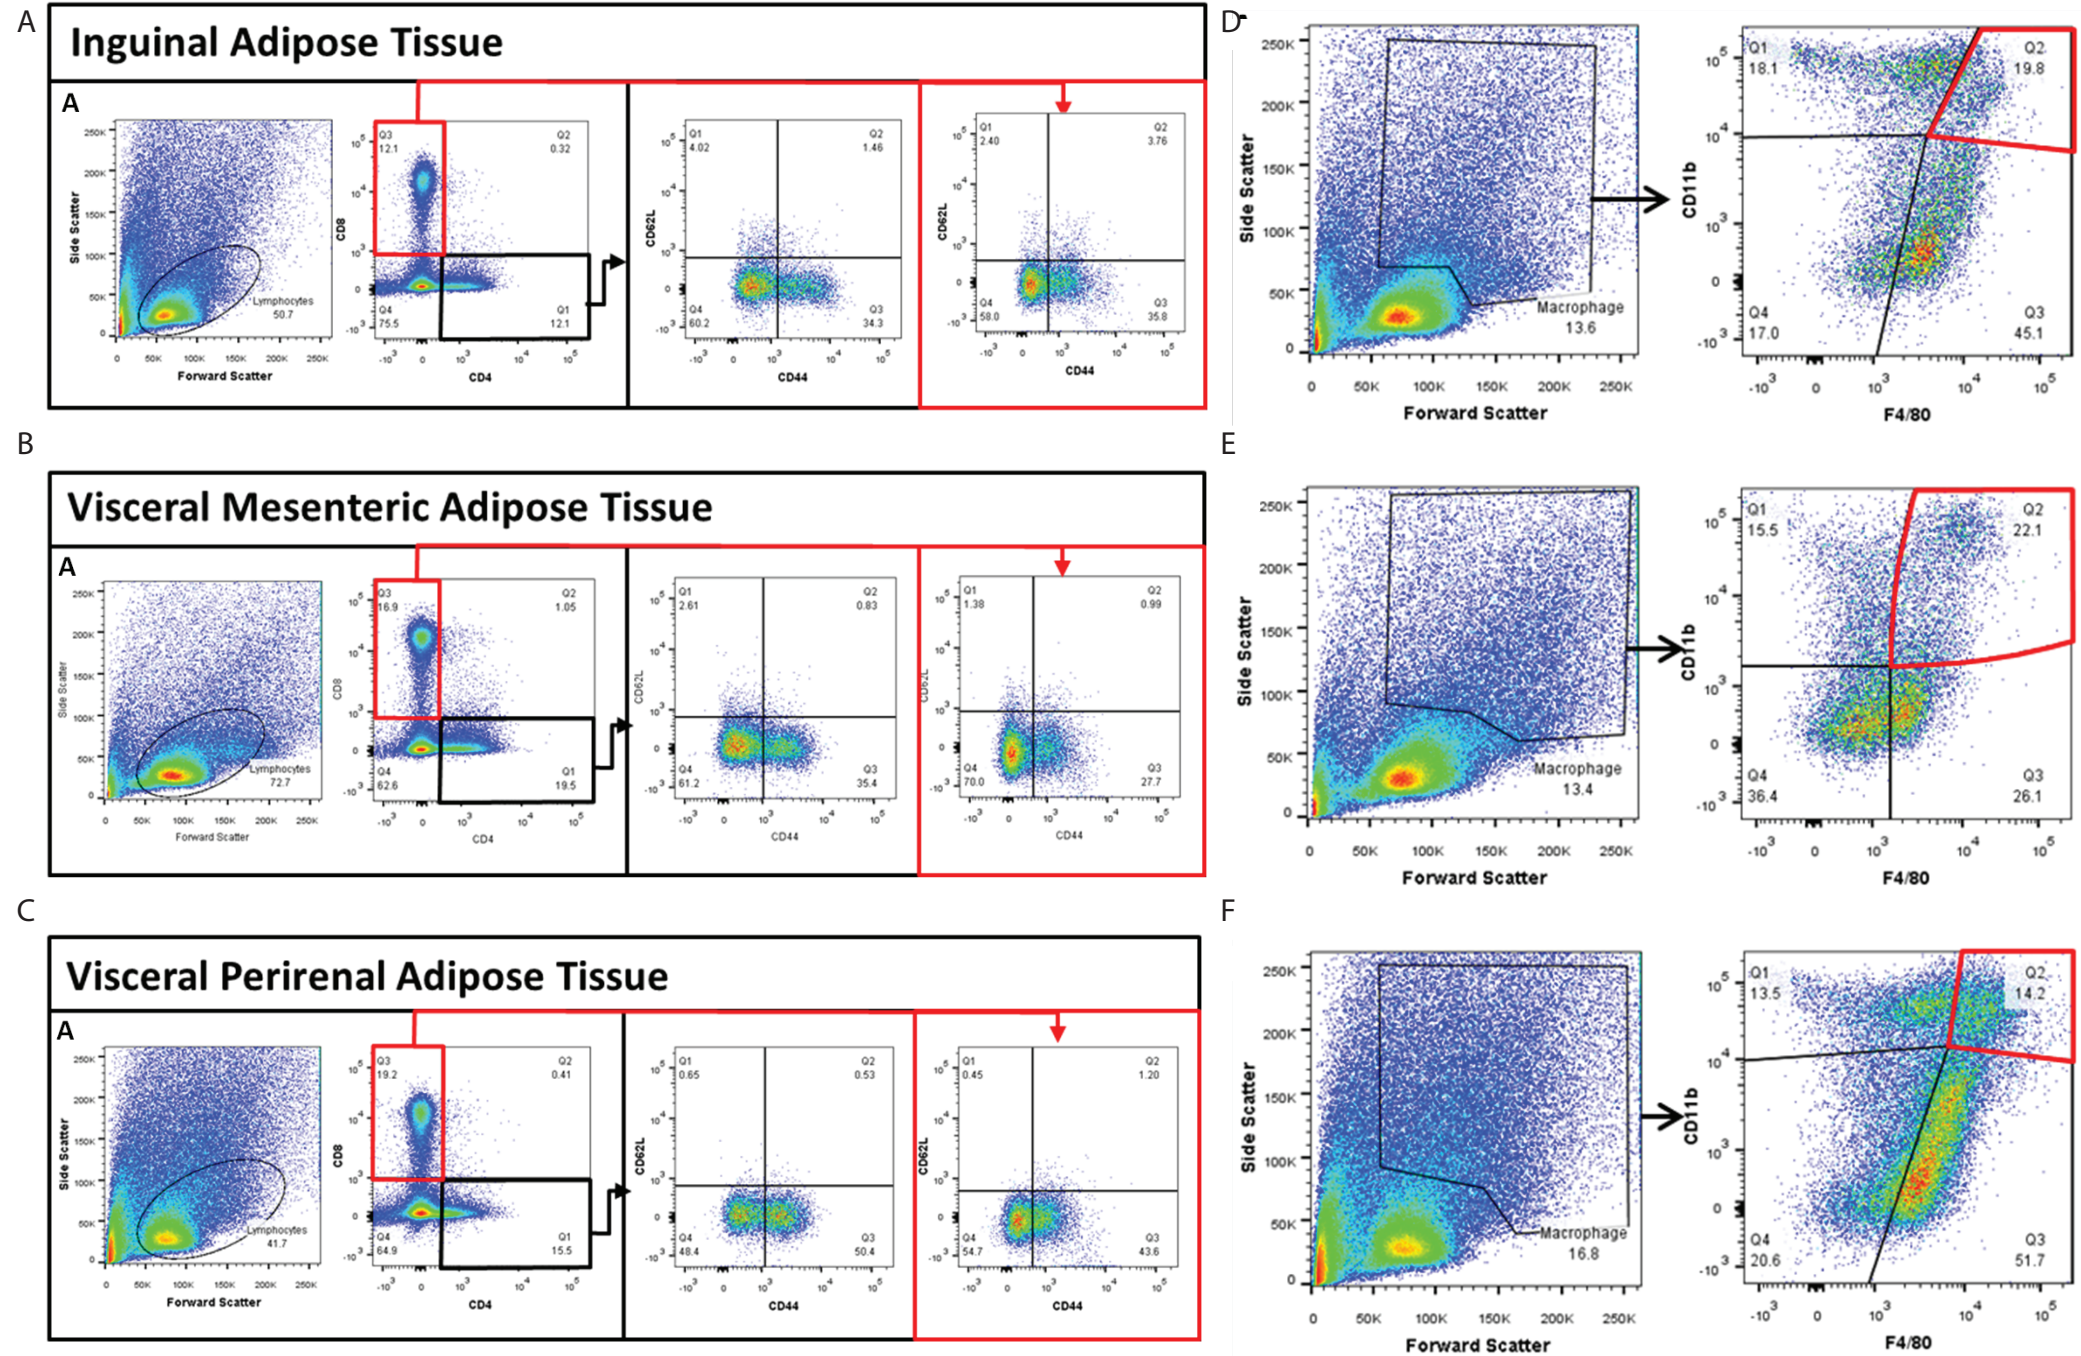

**Supplemental Figure 4. Representative FACS plot depicting analysis of adipose tissue macrophages (Related to Figure 2G-J).**

Representative flow cytometry dot plots of SVF from subcutaneous inguinal adipose tissue, visceral mesenteric adipose tissue and visceral perirenal adipose. Macrophage populations in **(A)** inguinal adipose tissue, **(B)** visceral mesenteric adipose tissue and **(C)** visceral perirenal adipose tissue gating strategy and macrophage quantifications. Flow gating strategy for lymphoid populations and T cell subset analysis in **(D)** inguinal adipose tissue, **(E)** visceral mesenteric adipose tissue, and **(F)** visceral perirenal adipose tissue. All data are represented as mean  $\pm$  SEM (mice are 8 month old, male high fat diet fed wild type,  $n=5$  and *Nucb2*<sup>-/-</sup>,  $n=8$ ).
